# Supplementary material
Source: PubMed Central journal article supplement (PMC3160663)
Supplement: emboj2011243s1.pdf [file emboj2011243s1.pdf]

## **Supplemental Information**

### **Supplemental Methods**

#### ***Cloning, Expression, and Purification of UbcH5c***

Human UbcH5c was cloned using BamHI and EcoRI restriction sites into the N-terminal GST fusion vector pGEX6P-1 (GE Healthcare). GST-UbcH5c was expressed in *E. coli* Rosetta2 cells. Cells were grown to an OD<sub>600nm</sub> of 0.6 in LB media containing 50 µg/mL carbenicillin and 12.5 µg/mL chloramphenicol, induced by addition of 0.5 mM IPTG, grown overnight at 16° C, and harvested by centrifugation. Cell pellets were resuspended in buffer A (50 mM Tris pH 7.5, 150 mM NaCl, 1 mM DTT), homogenized using a Microfluidics M-110Y Microfluidizer (MFIC Corp.), and then the suspension was centrifuged at 27,000 g for 1 h. Supernatants were passed through a 0.2 µm filter and applied to a column of Glutathione Sepharose 4B (GE Healthcare). The column was washed with buffer B (50 mM HEPES pH 7.2, 150 mM NaCl, 1 mM DTT), followed by buffer C (50 mM HEPES pH 7.2, 150 mM NaCl, 1 mM DTT, 0.05% Tween-20), and buffer D (50 mM Tris pH 7.0, 150 mM NaCl, 1 mM EDTA, 1 mM DTT). UbcH5c was released by overnight on-column cleavage with 200 units of GST-PreScission protease (GE Healthcare) in buffer D at 4°C. Following cleavage, UbcH5c was applied to a SP HP column (GE Healthcare) in buffer E (20 mM sodium citrate pH 5.8, 1 mM DTT), and eluted using a gradient from 0 – 1 M NaCl in buffer E. UbcH5c then further purified using a Superdex S75 16/60 gel-filtration column (GE Healthcare) that had been previously equilibrated in buffer B. Fractions containing UbcH5c were pooled, concentrated using 3,000-MWCO centrifugal concentrators (Millipore) to 5 mg/mL, and stored at 4° C.

#### ***Cloning, Expression, and Purification of Bmi1/Ring1b Complexes***

Human Bmi1 (residues 1-109, hereafter “Bmi1”) was cloned using NdeI and XhoI restriction sites into the pET24-b vector (EMD Biosciences), producing Bmi1 with a C-terminal His<sub>6</sub> fusion. Human Ring1b (residues 1-116, hereafter “Ring1b”) was cloned using BamHI and EcoRI restriction sites into pGEX6P-1, as described above for UbcH5c. Ring1b was also cloned into a modified form of the pET52-b vector (EMD Biosciences), which contained an N-terminal His<sub>6</sub> tag, a TEV protease cleavage site, and an Avi tag (GeneCopoeia, Inc.). Complexes of GST-tagged Ring1b/Bmi1 were made by coexpression in *E. coli* Rosetta2 cells, which were grown to an OD<sub>600nm</sub> of 0.6 in LB media containing 50 µg/mL carbenicillin, 50 µg/mL kanamycin, and 12.5 µg/mL chloramphenicol, and 10 µM ZnCl<sub>2</sub>. Expression of protein was induced by addition

of 0.5 mM IPTG, and cells were grown overnight at 16° C. Cell pellets were resuspended in buffer A, homogenized, centrifuged and filtered as described above. Filtered supernatants were applied to a column of Ni-NTA Superflow (Qiagen, Inc.), washed extensively with buffer A containing 30 mM imidazole, and eluted with buffer A containing 250 mM imidazole. Eluted fractions were concentrated, the buffer was exchanged into buffer B, and the material was applied to a column of Glutathione Sepharose 4B. The column was washed and proteins were eluted by overnight cleavage with PreScission protease as described above. The Ring1b/Bmi1 complex was further purified by chromatography using a Superdex 75 16/60 gel-filtration column that was equilibrated in buffer B plus 10% glycerol. Fractions containing the complex were pooled, concentrated and stored as described above.

For production of biotinylated protein, complexes of Avi-tagged Ring1b/Bmi1 were coexpressed with the *E. coli* biotin ligase gene BirA (pET52-b vector) in *E. coli* BL21(DE3) cells. Cells were grown and induced as described for the GST-Ring1b/Bmi1 complexes above, except that 50 μM D-Biotin was added at the time of induction. Biotin-Ring1b/Bmi1 was resuspended, homogenized, centrifuged, filtered, and purified by Ni-NTA chromatography as described above. Following elution from Ni-NTA columns, the material was dialyzed overnight into buffer F (50 mM HEPES pH 7.2, 25 mM NaCl, 1 mM DTT) along with 500 units of AcTEV protease (Invitrogen, Inc.). Following dialysis, samples were applied to a SP HP column in buffer F, and then eluted using a gradient from 0–1 M NaCl in buffer F. The biotin-Ring1b/Bmi1 was further purified by gel-filtration chromatography, pooled, concentrated and stored as described for the Ring1b/Bmi1 complexes above.

## **Supplemental Figures**

### **Supplemental Figure 1**

Overlay of the Bmi1/Ring1b RING-RING heterodimer from the Bmi1/Ring1b-UbcH5c crystal structure (this study) with previous crystal structures of Bmi1/Ring1b (PDBs: 2H0D, and 2CKL). Bmi1/Ring1b overlay closely, with an average backbone r.m.s.d. of 0.44 Å over 673 atoms (PDB: 2H0D) and 0.40 Å over 685 atoms (PDB: 2CKL), respectively.

### **Supplemental Figure 2**

Characterization of purified human nucleosomes. **(A)** Protein content of nucleosomes. Samples of purified recombinant proteins ( $\approx$  1  $\mu$ g individual histones, 2  $\mu$ g H2A/H2B dimer and (H3.1/H4)<sub>2</sub> tetramer) and 4  $\mu$ g nucleosomes, as indicated, were run on a 4-12% NuPAGE® Bis-Tris precast gel, and stained with SafeStain (Invitrogen, Inc.). **(B)** Nucleic acid content of nucleosomes. 4  $\mu$ g nucleosomes was digested with Proteinase K and run on a 1.2% E-gel (Invitrogen, Inc.). Lane markers: 1 = 1-kb ladder (New England Biolabs, Inc.), 2 = 100-bp TrackIt ladder (Invitrogen, Inc.), 3 = Nucleosomes. Complete digestion releases a DNA fragment of  $\approx$  400 bp, corresponding approximately to tri-nucleosomes.

### **Supplemental Figure 3**

Tandem mass spectrum of a ubiquitin modified histone H2A peptide. Bmi1/Ring1b was incubated with ATP, E1, UbcH5c, and nucleosomes as described earlier, and products were separated by SDS-PAGE. A 22-kDa band (corresponding to the molecular weight of H2A-ubiquitin) was excised from the gel, subjected to tryptic digestion, and analyzed on a hybrid LTQ-Orbitrap (ThermoFisher) mass spectrometer. An ion at 725.119 m/z was detected, corresponding to the triply charged state of the H2A peptide <sup>100</sup>VTIAQGGVLPNIQAVLLPKK<sup>119</sup> containing two additional glycine residues from the C-terminus of ubiquitin. This ion was subjected to collision-induced dissociation (CID), and b- and y-ions were detected corresponding to H2AK118ub. Although K119 is the site of *in vivo* modification described previously, the presence of two glycines on the sidechain of K119 would prevent trypsin cleavage after K119; thus, only peptides with K118-modification were detected from this parent ion. It is likely that either site can be modified by Bmi1/Ring1b activity *in vitro*. Our mass spectral data do not indicate with high confidence either that K119 is modified or that it is not.

### Supplemental Figure 4

F-EMSA titration. A fixed concentration (70 nM) of 5'-FAM DNA probe was incubated with increasing concentrations of Bmi1/Ring1b (39.1 nM to 20  $\mu$ M) at room temperature for 10 min. Samples were mixed 1:1 with 50% glycerol, loaded onto 6% TBE gels, and separated by electrophoresis as described in the Materials and Methods. Gels were imaged using a Typhoon image scanner with excitation and emission at 488 and 526 nm, respectively. Symbols: \* = Bmi1/Ring1b-probe complex, ° = free probe.

### Supplemental Figure 5

Bmi1 and Ring1b contain basic residues not found in other RING-domain E3 ligases. (A) Electrostatic potential molecular surfaces of the RING-RING dimers of Bmi1/Ring1b, BRCA1/BARD (PDB: 1JM7), and cIAP2 (homodimer, PDB: 3EB5). Surfaces were generated using the Adaptive Poisson-Boltzmann Solver (APBS) plugin to PyMol (DeLano Scientific, LLC), were colored according to solvent-accessible surface area, and were contoured to  $\pm 4.0$  kT/e. A large basic saddle region is formed by residues at the base of Ring1b (left) and Bmi1 (right). BRCA1/BARD contains a basic region on BRCA1 only, while BARD is neutral. cIAP2 is less basic overall. (B) Sequence alignment of RING-domains from several E3 ligases. Conserved Zn<sup>2+</sup>-binding cysteine and histidine residues are highlighted in beige. A conserved acidic residue required for E2-binding is highlighted in pink. Non-conserved basic residues on the Ring1b and Bmi1 are highlighted in blue. (C) Location of mutations made in Bmi1 and Ring1b. Residues that make up the “basic saddle” on Bmi1 and Ring1b are colored in blue, while basic residues that localize to a region on the opposite face of the heterodimer are colored in orange.

### Supplementary Figure 6

Gel-filtration traces of Bmi1/Ring1b mutant complexes. Samples of purified protein were injected onto a Superdex 75 16/60 gel-filtration column that had been equilibrated with buffer B as described in the Materials and Methods section. Bio-Rad gel filtration standards were run over the same column in identical fashion, to calibrate the column. All Bmi1/Ring1b mutant complexes eluted at a volume corresponding to a molecular weight of  $\approx 27$  kDa, indicating that each complex is a 1:1 heterodimer between a Bmi1 subunit and a Ring1b subunit. *Top*: Traces for Ring1b mutants. *Bottom*: Traces for Bmi1 mutants.



### **Supplementary Figure 7**

Representative members of the two clusters arising from biochemically-driven docking of Bmi1/Ring1b-UbcH5c against the nucleosome. Models are shown as C $\alpha$ /phosphate traces, with Bmi1 colored orange, Ring1b colored light blue, UbcH5c colored gray, and the nucleosome colored pink/red. **(A)** The top ten models by intermolecular energy belonging to the largest cluster (197 out of 200 trajectories), with the UbcH5c catalytic cysteine and histone H2A acceptor lysine rendered as spheres. **(B)** The only two models belonging to the second-most populated cluster, which are rotated 180° about the UbcH5c catalytic cysteine relative to the cluster shown in **A**.

# Supplemental Figure 1

UbcH5c complex

PDB: 2H0D

PDB: 2CKL

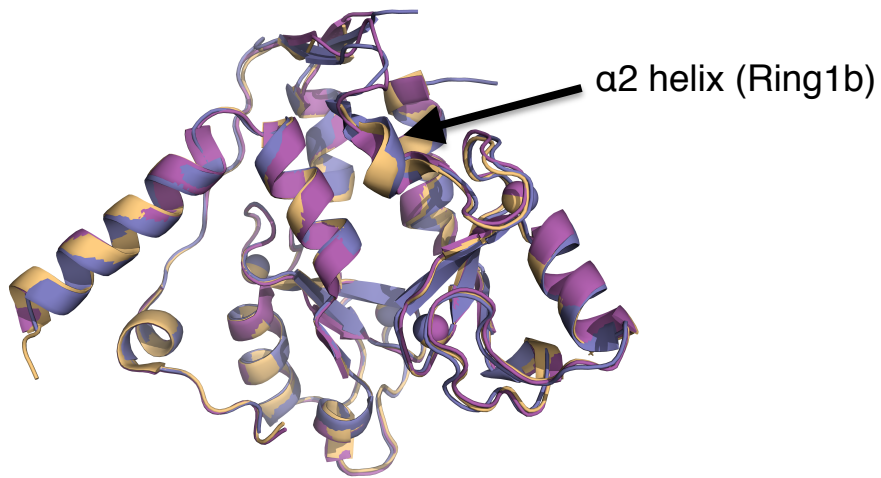

Supplemental Figure 2

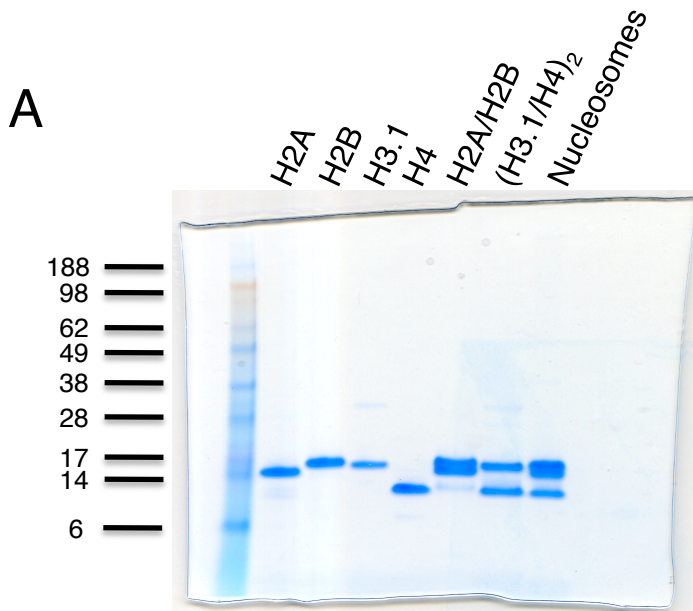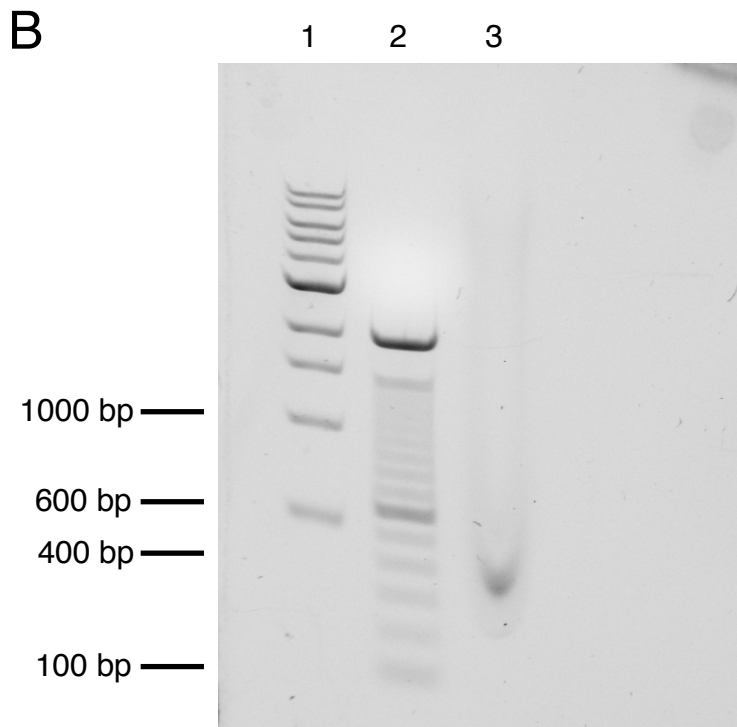

# Supplemental Figure 3

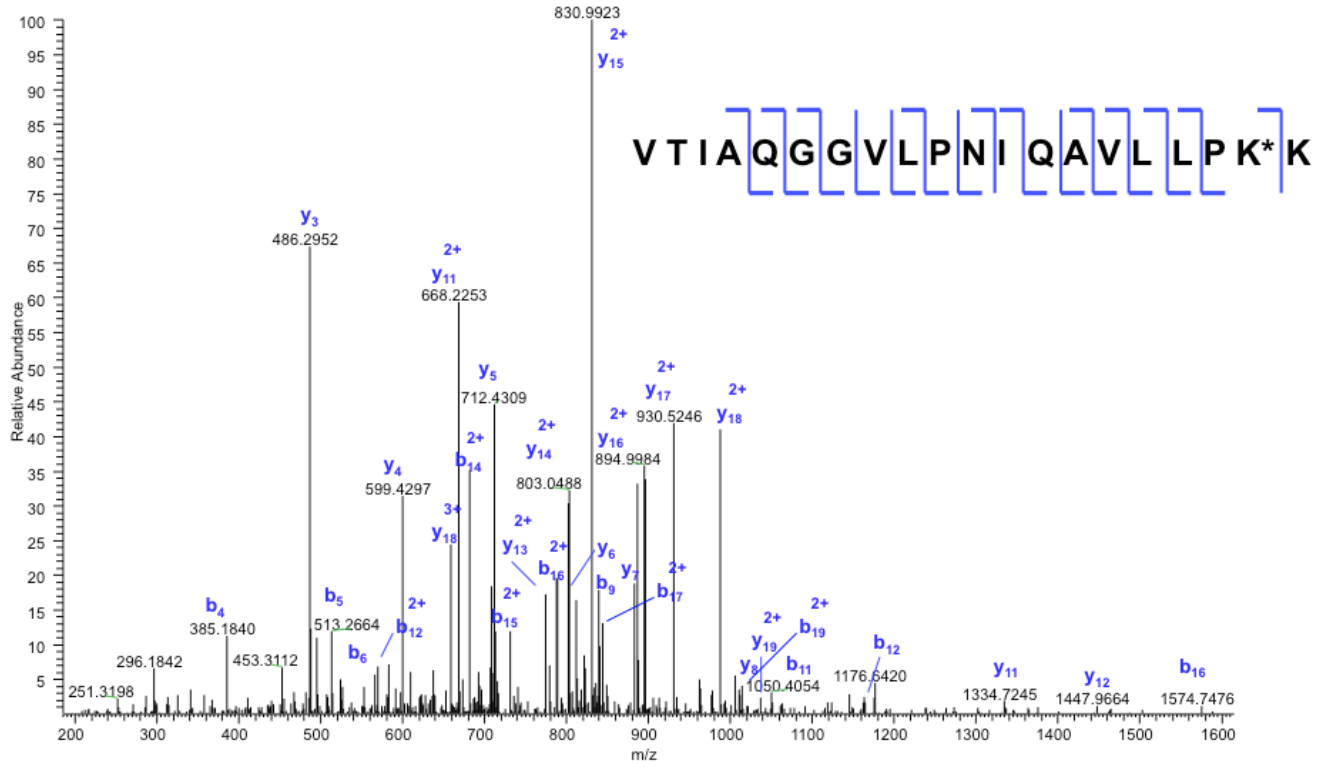

\* Site of ubiquitin modification

# Supplemental Figure 4

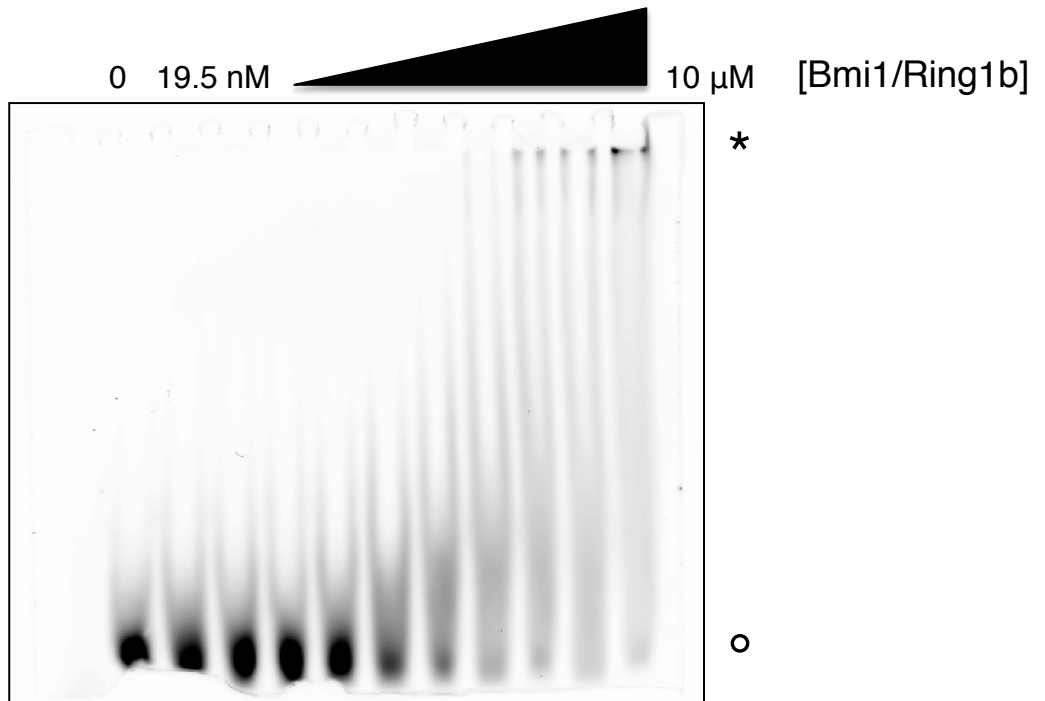

Supplemental Figure 5

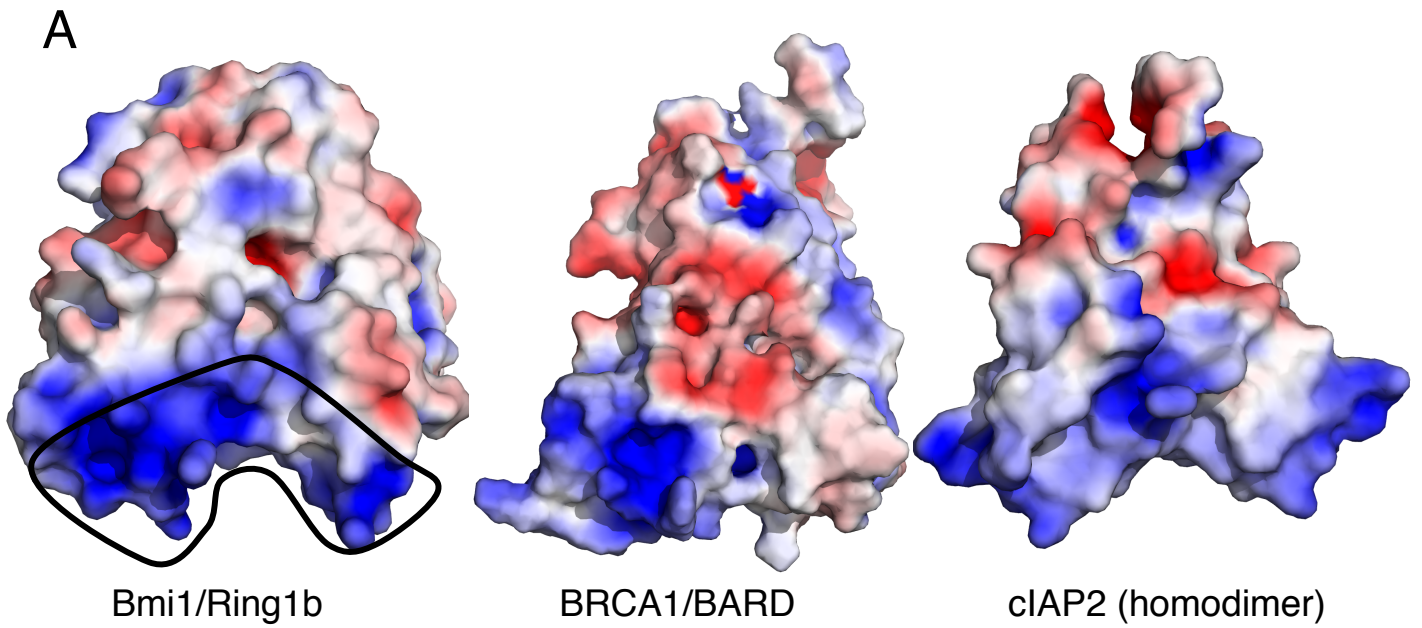

**B**

```

BARD1_human  41 LDRL-----E-KLLR|SRC---TNI|LRE---P-VCLGG|CE|I|F-C|SNC|VSDCI-----GTG|CPV|CYTPA---WI-QDL--K---INR--  99
Bmi1_human    9 ITE---L----N-PHLM|QVL---GGYFID---A-TT|I|E|CL|SF-K|T|C|VRYLE---T-SKY|CP|CDVQV---H|K|R|P|L--LN|I|RS|DK--  73
BRCA1_human  15 INA---M----Q-K|L|E|C|P|I---L|L|I|K|E---P-VS-TK|C|D|I|F-C|K|F|C|MLK|L|LN|Q|K|G|P|S|Q|P|L|C|K|N|D|I---T|K|R|S|L--Q---E|S|T--  77
Ring1a_human 39 PRS---L----H-SEL|MC|P|I---L|D|ML|KN---T-M|T|T|K|E|C|L|R|F-C|S|D|C|I|V|T|A|L|R--S|G|N|K|E|C|P|T|C|R|K|L|V--S|K-R|S|L--R---P|D|P--  101
Ring1b_human 42 PRS---L----H-SEL|MC|P|I---L|D|ML|KN---T-M|T|T|K|E|C|L|R|F-C|A|D|C|I|I|T|A|L|R--S|G|N|K|E|C|P|T|C|R|K|L|V--S|K-R|S|L--R---P|D|P--  104
ciAP1_human 562 LRRLL-----Q-E-ERT|CKV---M|D|K|E|V|S---V-V|F-I|P|C|G|L|V|V|Q|E|C|A|P|S|L-----R|K|C|P|I|C|R|G|I|I---K|G-T-----V|R--  614
ciAP2_human 548 LRRLL-----Q-E-ERT|CKV---M|D|K|E|V|S---V-V|F-I|P|C|G|L|V|V|Q|E|C|A|P|S|L-----R|K|C|P|I|C|R|S|T|I---K|G-T-----V|R--  600
xiAP_human  441 LRR---L----Q-EEK|L|K|I---M|D|R|N|I|A---I-V|F-V|P|C|G|L|V|T|K|Q|C|A|E|A|V-----D|K|P|M|C|Y|T|V|I---T|F-K-----Q|K--  493
c-Cbl_human 364 TQEYQ|E|L|Y|C|E|M|G|S|T|F|L|K|I---A|N|D|K|D---V--K|I|E|P|C|G|L|M--T|S|C|L|S|W|Q|E---S|E|G|Q|G|P|F|C|R|C|E|I---K|G-T|E|P-I|V---V|D|P--  433
CNOT4_human   6 -D|A---K----E-D|P|V|E|C|P|L---M|E|P|L|E|I|D|D|I|N--F|F|P|C|T|G|Q|I---C|R|F|C|W|H|R|I|R|T---D|E|N|G|L|C|P|A|C|R|K|P|Y---P|E-D|P|A-V|Y|K|P|L|S|Q|E--  73
RAG1_human  283 FPEH--F-----V-K|S|I|S|Q|I---H|I|L|A|D--P-V|E-T|N|C|K|V|F-C|R|V|C|I|L|R|C|L|K--V|M|G|S|Y|C|P|S|C|R|Y|P|C---F|P-T|D|L--E---S|P|V---  344
MAT1_human   1 -----M--D|D|Q|G|P|R|C|K|T|T|K|Y|R|N|P|S---L|K|L|M|V|N|V|C|G|T|L--E|C|S|C|V|D|L|L|F|V--R|G|A|G|N|C|P|E|C|G|T|P|L---R|K-S|N|F-R|V|Q|L|F|E|D|P--  66
PML_human   48 S|E|E---E----F-Q|F|L|R|Q|Q|C---Q|A|E|A|K|C---P-K|L-L|P|C|L|T|L--S|G|C|L---E---A|S|G|M|Q|C|P|I|C|Q|A|P|W|P|L|G|A|D|T|P|A|L|D|N|V---F|F|E|S|L  112
    
```

**C**

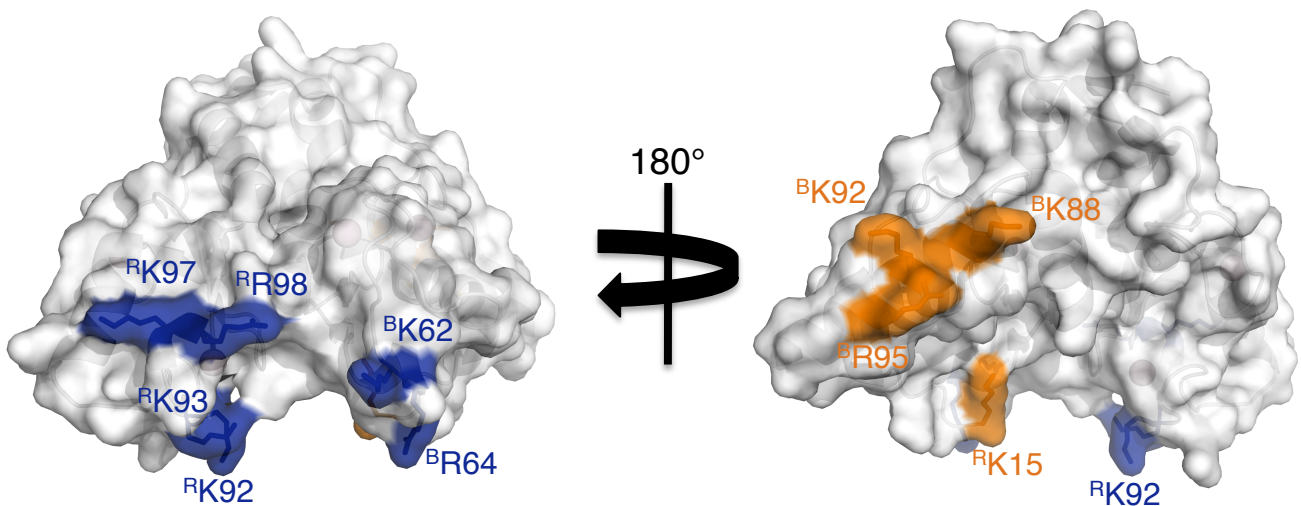

# Supplemental Figure 6

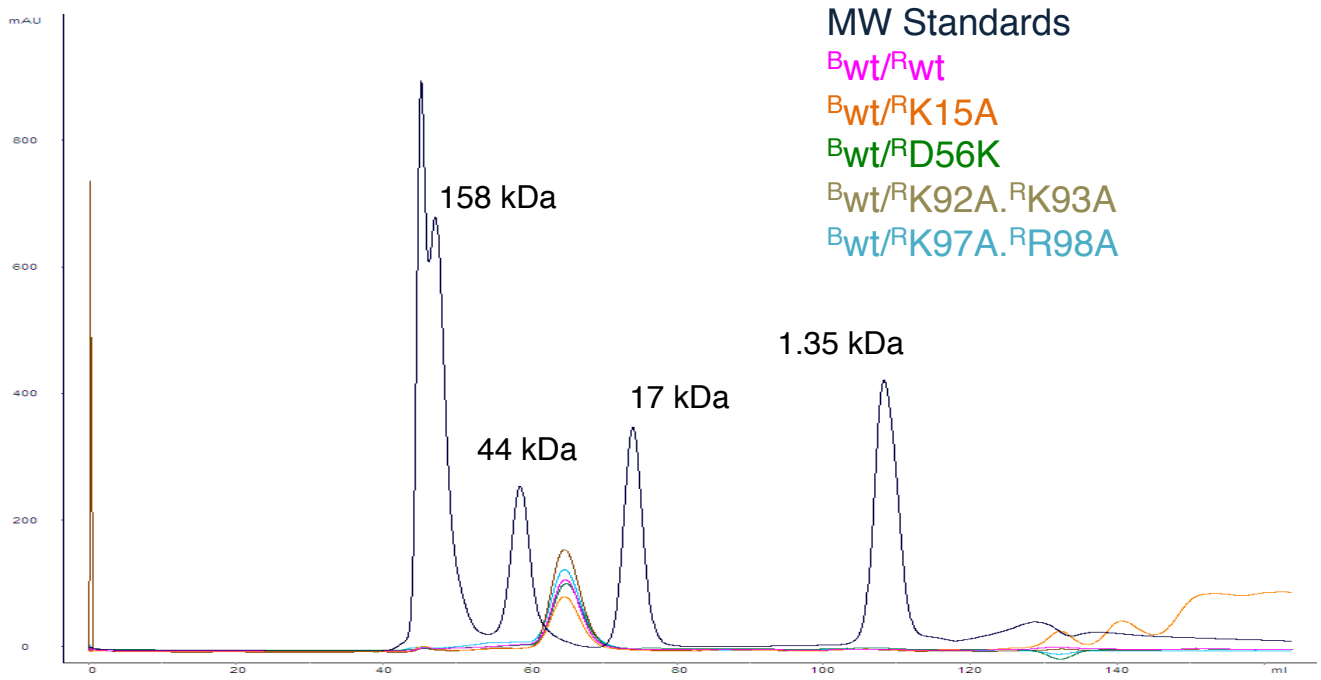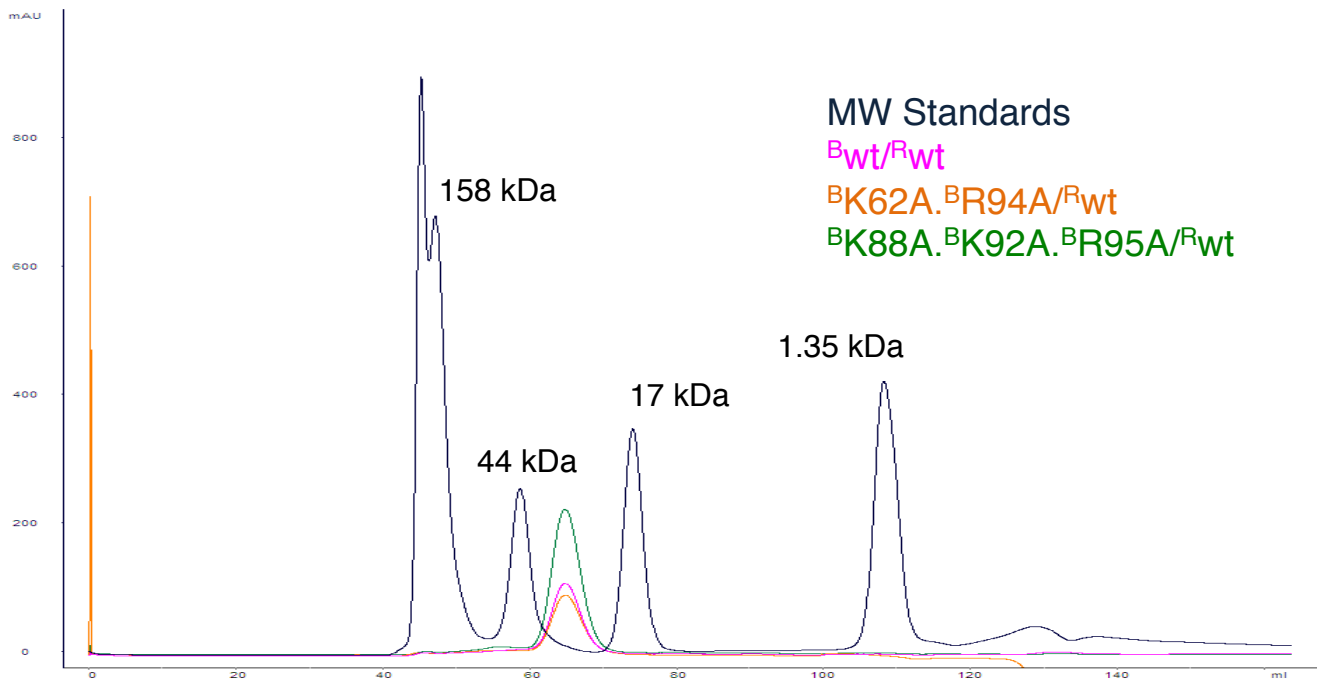

Supplemental Figure 7

A

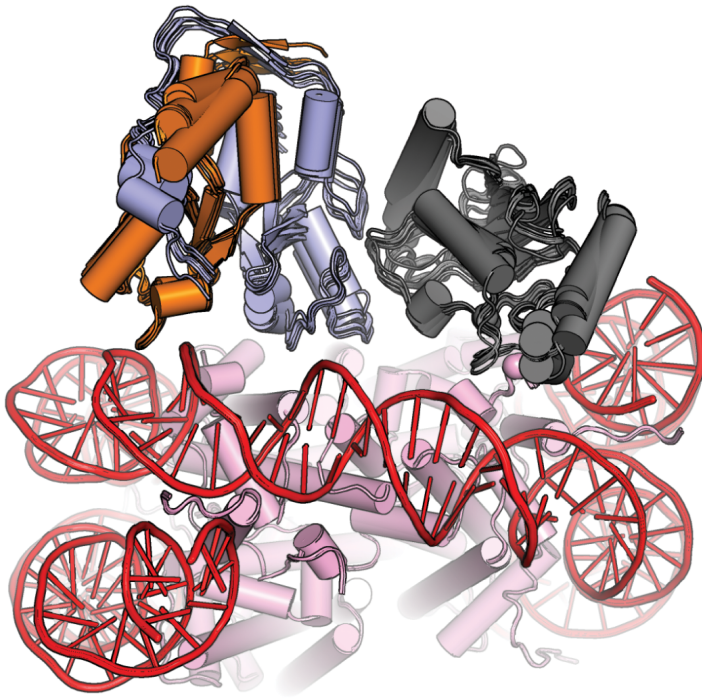

Cluster #1  
197/top 200 models

B

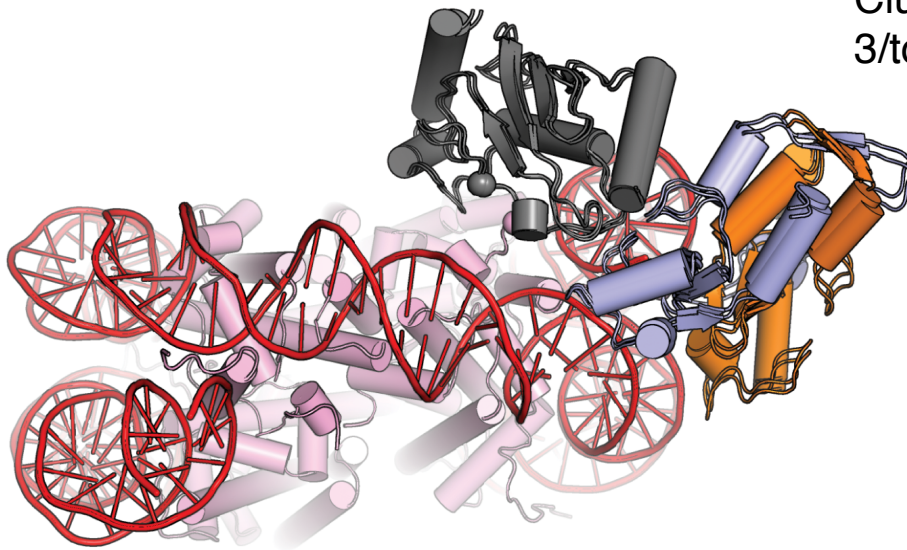

Cluster #2  
3/top 200 models
